# Supplementary material
Source: PubMed Central journal article supplement (PMC8224988)
Supplement: NIHMS1714388-supplement-1.pdf [file NIHMS1714388-supplement-1.pdf]

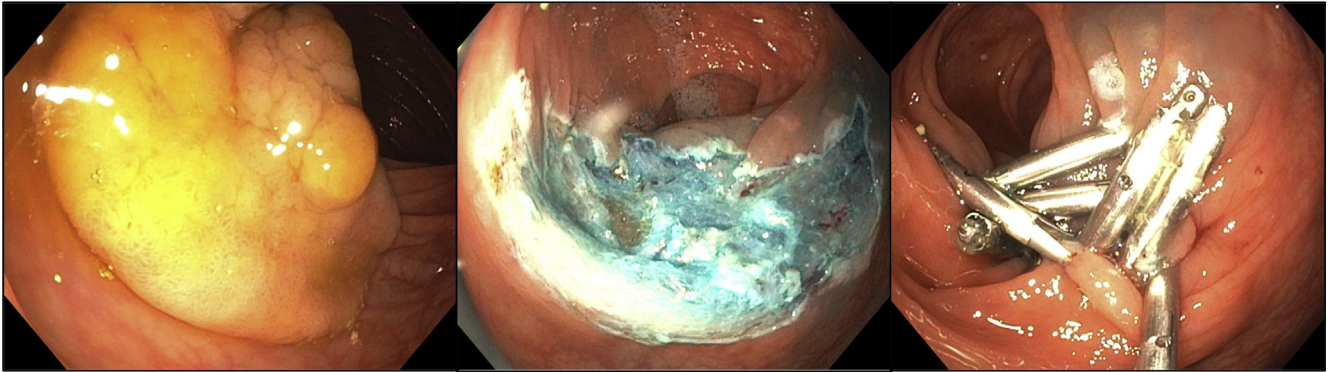

**Supplementary Figure 1.** Large (50 mm) non-pedunculated colon polyp, mucosal defect after resection, and closed defect using clips. Pathology showed a villous adenoma with features of a traditional serrated adenoma.

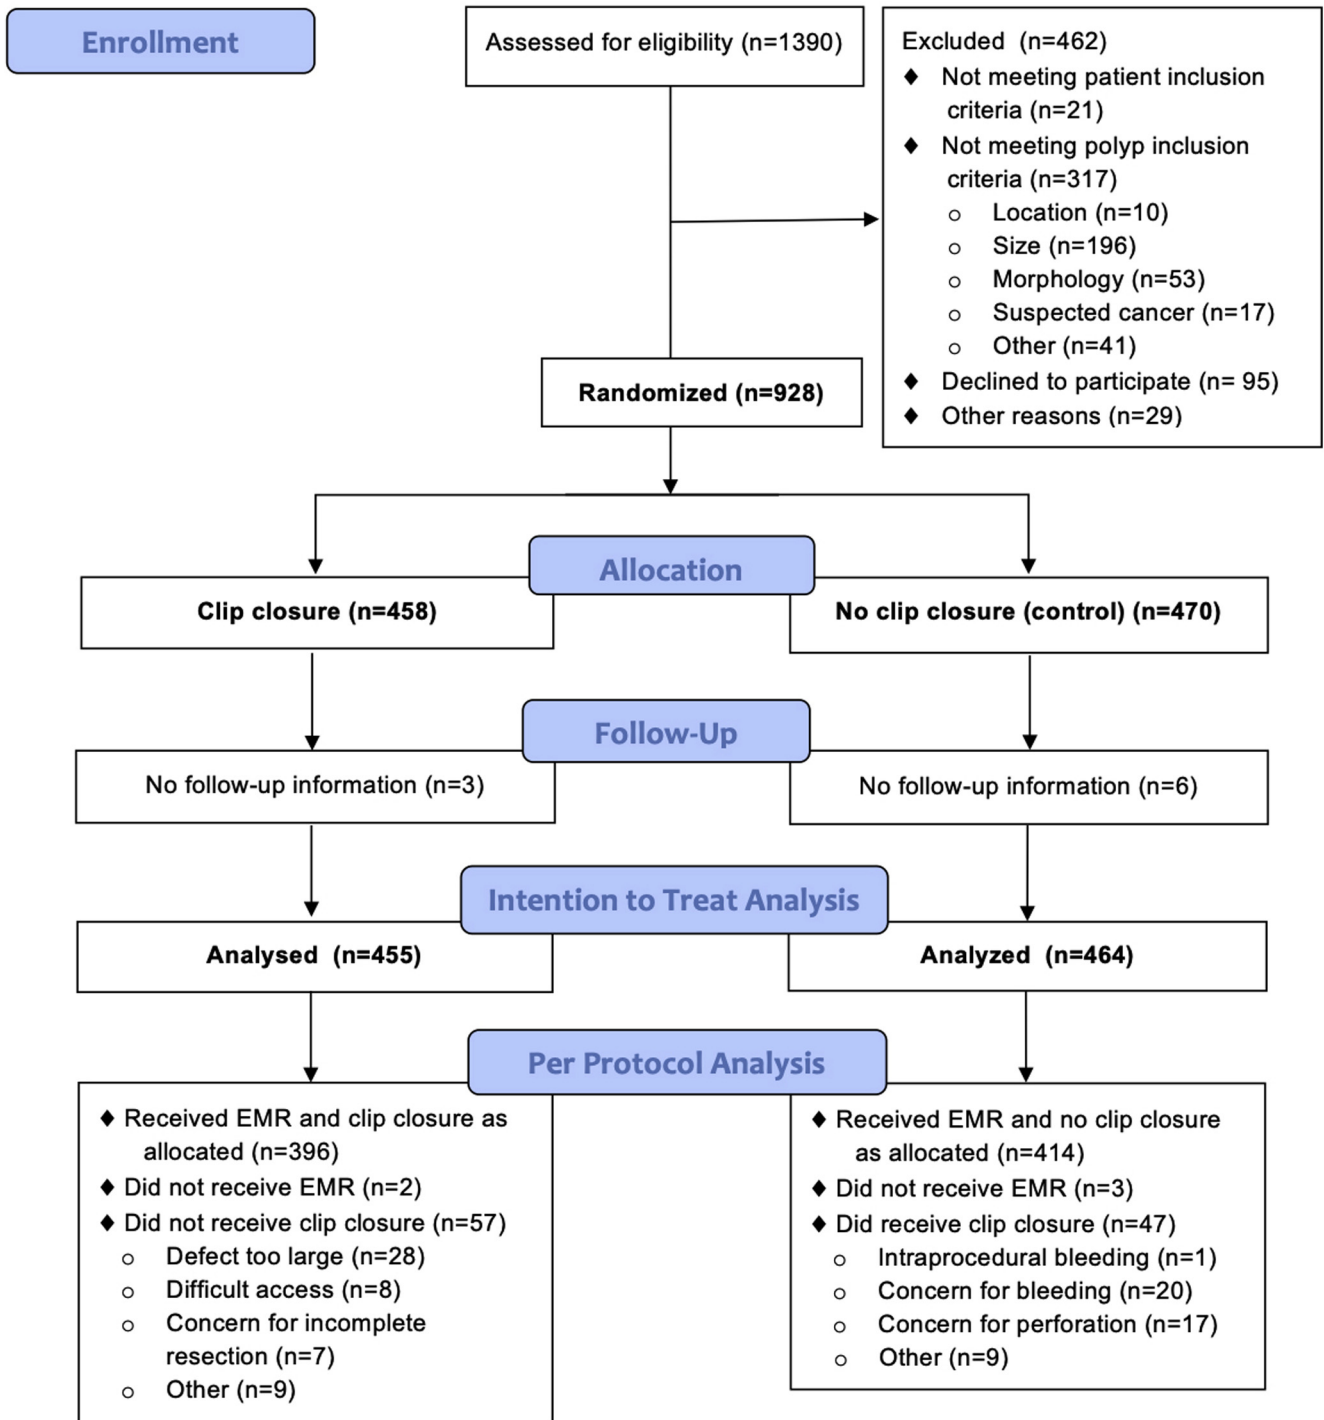

**Supplementary Figure 2.** Flow diagram. Ascertainment of follow-up information: medical record review:  $n = 3$  (clip group),  $n = 1$  (control group); direct patient contact (phone call or clinic visit):  $n = 452$  (clip group),  $n = 463$  (control group).

**Supplementary Table 1.** Treatment and outcomes of post-procedure bleeding

|                                             | Clip group (n = 16) | Control group (n = 33) | P    |
|---------------------------------------------|---------------------|------------------------|------|
| Time to bleeding event, median days (IQR)   | 7 (2, 9)            | 1 (0, 5)               | .007 |
| Length of stay, median days (IQR)           | 2.0 (1, 2)          | 2 (1, 3)               | .662 |
| Colonoscopy performed, n (%)                | 7 (43.8)            | 21 (63.6)              | .228 |
| Patients requiring blood transfusion, n (%) | 3 (18.8)            | 6 (18.2)               | 1.0  |
| Mean number of transfusions (SD)            | 3.0 (1.7)           | 3.8 (1.9)              | .551 |

SD, standard deviation.

**Supplementary Table 2.** Per-Protocol Analysis of Postprocedure Bleeding Events by Assigned Intervention

| Outcomes         | Clip group (n = 453)     | Control group (n = 463)   | Absolute risk difference, % (95% CI) <sup>a</sup> |
|------------------|--------------------------|---------------------------|---------------------------------------------------|
| All patients     |                          |                           |                                                   |
| Complete closure | 8/305 (2.6) <sup>b</sup> | 2/25 (8.0)                | 4.5 (1.6 to 7.4) <sup>b</sup>                     |
| Partial closure  | 2/91 (2.2) <sup>b</sup>  | 2/22 (9.1)                |                                                   |
| No closure       | 6/57 (10.5)              | 29/414 (7.0) <sup>b</sup> |                                                   |
| Proximal         |                          |                           |                                                   |
| Complete closure | 5/205 (2.4) <sup>b</sup> | 1/18 (5.6)                | 7.0 (3.1 to 10.9) <sup>b</sup>                    |
| Partial closure  | 2/65 (3.1) <sup>b</sup>  | 2/13 (15.4)               |                                                   |
| No closure       | 3/34 (8.8)               | 28/291 (9.6) <sup>b</sup> |                                                   |
| Distal           |                          |                           |                                                   |
| Complete closure | 3/100 (3.0) <sup>b</sup> | 1/7 (14.3)                | -1.6 (-4.7 to 1.5) <sup>b</sup>                   |
| Partial closure  | 0/26 (0) <sup>b</sup>    | 0/9 (0)                   |                                                   |
| No closure       | 3/23 (13.0)              | 1/125 (0.8) <sup>b</sup>  |                                                   |

NOTE. In the clip and control groups, values in parentheses are percentages. Definition for patients with multiple polyps (n = 60): Complete = all polyps were closed completely; partial = all polyps were at least partially closed; no closure = at least 1 polyp was not closed. Proximal = Patients with any large polyp in the proximal colon, defined as located at the hepatic flexure, in the ascending colon, or cecum. Distal = Patients with a large polyp only in the descending colon.

<sup>a</sup>Absolute risk difference calculated between patients in the clip group, who underwent complete or partial clip closure compared with patients in the control group who did not undergo clip closure.

<sup>b</sup>Patients who underwent the assigned intervention.
